# Supplementary material
Source: publisher figshare collection journal article supplement (https://gsapubs.figshare.com/ndownloader/files/22747175)
Supplement: Supplementary file 1 [file 22747175]

**Data Repository Item 2007161**

DR Table 1 Clast types and inferred source lithology recorded in the Loreto basin

| <b>Clast type</b> | <b>Description</b>                                                                                        | <b>Source lithology(s)/unit(s)</b> |
|-------------------|-----------------------------------------------------------------------------------------------------------|------------------------------------|
| Mm                | Chlorite and epidote rich green clast; or fine-grained, crystalline green clast                           | Metamorphic                        |
| Kg                | Granite                                                                                                   | Granite                            |
| Es                | White sandstone, medium grained, often laminated                                                          | Eocene Sandstone                   |
| Ad                | Andesite, sparse plagioclase crystals, medium grained                                                     | Footwall Dykes (all sources)       |
| Ab                | Green or red fine grained andesite with abundant thin plagioclase lathes (2-5mm long) and rare hornblende | MCM                                |
| Adh               | Andesite with abundant hornblende lathes                                                                  | Dykes, MCL, MCM                    |
| Vcc               | Red-brown sandstone and conglomerate clasts                                                               | MCL                                |
| Alt               | Red altered volcanic clasts                                                                               | Volcanic and altered flows         |
| Mv                | Low density pink, grey volcanic rock with abundant hornblende                                             | Volcanic and altered flows         |
| Lv                | Layered volcanic clasts                                                                                   | Volcanic and altered flows         |
| Ti                | Coarse-grained white volcanic                                                                             | Unknown                            |
| Sh                | Shells                                                                                                    | Pliocene reworking                 |
| Ukn               | Unknown clasts type                                                                                       | Unknown                            |
